# Supplementary material
Source: PubMed Central journal article supplement (PMC9637275)
Supplement: jamacardiol-e224348-s001.pdf [file jamacardiol-e224348-s001.pdf]

## Supplemental Online Content

Talha KM, Butler J, Greene SJ, et al. Population-level implications of sodium-glucose cotransporter-2 inhibitors for heart failure with preserved ejection fraction in the US. *JAMA Cardiol*. Published online November 5, 2022. doi:10.1001/jamacardio.2022.4348

**eTable 1.** Treatment effects and number needed to treat with SGLT-2 inhibitors in the EMPEROR-Reduced and EMPEROR-Preserved trials using negative binomial analysis

**eTable 2.** Characteristics of NHANES participants with heart failure without potential clinical intolerance based on blood pressure or kidney function

**eTable 3.** Adverse event rates and numbers needed to harm with SGLT-2 inhibitors in the EMPEROR-Reduced and EMPEROR-Preserved trials

This supplemental material has been provided by the authors to give readers additional information about their work.

**eTable 1:** Treatment effects and number needed to treat with SGLT-2 inhibitors in the EMPEROR-Reduced and EMPEROR-Preserved trials using negative binomial analysis.

| Endpoint                                                | Rate (95% CI) (per 100 patient years) |                      | Measure* (95% CI) | Rate difference (95% CI) |                         | Number needed to treat (NNT) (95% CI) |                |
|---------------------------------------------------------|---------------------------------------|----------------------|-------------------|--------------------------|-------------------------|---------------------------------------|----------------|
|                                                         | Placebo                               | Empagliflozin        |                   | 1-year outcome           | 3-year outcome          | 1-year outcome                        | 3-year outcome |
| <b>EMPEROR-Reduced and EMPEROR-Preserved, all LVEFs</b> |                                       |                      |                   |                          |                         |                                       |                |
| <b>Total HF hospitalization</b>                         | 14.78 (13.39, 16.32)                  | 10.53 (9.47, 11.71)  | 0.72 (0.63, 0.83) | -5.34<br>(-7.46, -3.22)  | -4.27<br>(-6.10, -2.44) | 19 (14, 32)                           | 8 (6, 14)      |
| <b>CV death and total HF hospitalization</b>            | 23.86 (21.81, 26.10)                  | 18.24 (16.61, 20.04) | 0.77 (0.69, 0.87) | -6.49<br>(-9.46, -3.52)  | -5.62<br>(-8.34, -2.90) | 16 (11, 29)                           | 6 (4, 12)      |
| <b>Worsening HF events †</b>                            | 26.20 (23.97, 28.63)                  | 19.77 (18.02, 21.69) | 0.76 (0.68, 0.86) | -7.67<br>(-10.90, -4.43) | -6.42<br>(-9.35, -3.48) | 14 (10, 23)                           | 6 (4, 10)      |
| <b>EMPEROR-Preserved trial, LVEF &gt;40%</b>            |                                       |                      |                   |                          |                         |                                       |                |
| <b>Total HF hospitalization</b>                         | 9.73 (8.49, 11.16)                    | 7.21 (6.23, 8.33)    | 0.73 (0.60, 0.89) | -3.98<br>(-6.10, -1.86)  | -2.56<br>(-4.24, -0.87) | 26 (17, 54)                           | 14 (8, 39)     |
| <b>CV death and total HF hospitalization</b>            | 15.90 (14.10, 17.93)                  | 12.54 (11.06, 14.21) | 0.78 (0.66, 0.93) | -4.46<br>(-7.26, -1.66)  | -3.37<br>(-5.83, -0.91) | 23 (14, 61)                           | 10 (6, 37)     |
| <b>Worsening HF events or CV death**</b>                | 17.55 (15.60, 19.74)                  | 13.69 (12.11, 15.48) | 0.77 (0.65, 0.91) | -4.98<br>(-8.03, -1.94)  | -3.83<br>(-6.47, -1.19) | 21 (13, 52)                           | 9 (6, 28)      |

*\* Negative binomial event rate ratio or hazard ratio depending on endpoint based on a model with standard study covariates.*

*† Worsening HF events include HF hospitalizations and urgent visits for HF requiring intravenous therapy.*

HF: heart failure; CV: cardiovascular; EMPEROR-Reduced: Empagliflozin Outcome Trial in Patients with Chronic Heart Failure with Reduced Ejection Fraction; EMPEROR-Preserved: Empagliflozin Outcome Trial in Patients with Chronic Heart Failure with Preserved Ejection Fraction; LVEF: left ventricular ejection fraction.

**eTable 2:** Characteristics of NHANES participants with heart failure without potential clinical intolerance based on blood pressure or kidney function

| Baseline Characteristics                       | All      |              |              | Females  |              |              | Males    |              |              |
|------------------------------------------------|----------|--------------|--------------|----------|--------------|--------------|----------|--------------|--------------|
|                                                | Estimate | Lower 95% CI | Upper 95% CI | Estimate | Lower 95% CI | Upper 95% CI | Estimate | Lower 95% CI | Upper 95% CI |
| <b>Mean Age (years)</b>                        | 66.4     | 64.8         | 68.0         | 68.6     | 66.1         | 71.0         | 64.7     | 62.5         | 67.0         |
| <b>Population ≥65</b>                          | 60.2%    | 51.6%        | 68.7%        | 68.8%    | 57.5%        | 80.0%        | 53.6%    | 43.9%        | 63.3%        |
| <b>Race/Ethnicity</b>                          |          |              |              |          |              |              |          |              |              |
| Mexican American                               | 4.1%     | 2.0%         | 6.1%         | 3.5%     | 0.6%         | 6.4%         | 4.5%     | 2.2%         | 6.7%         |
| Other Hispanic                                 | 6.4%     | 3.4%         | 9.4%         | 6.1%     | 2.6%         | 9.6%         | 6.7%     | 1.6%         | 11.7%        |
| Non-Hispanic White                             | 67.3%    | 60.0%        | 74.7%        | 63.8%    | 55.3%        | 72.3%        | 70.0%    | 60.7%        | 79.4%        |
| Non-Hispanic Black                             | 16.1%    | 10.5%        | 21.7%        | 20.2%    | 12.3%        | 28.1%        | 13.0%    | 6.6%         | 19.4%        |
| Non-Hispanic Asian                             | 2.3%     | 1.0%         | 3.7%         | 1.5%     | 0.0%         | 2.9%         | 3.0%     | 0.8%         | 5.1%         |
| Other                                          | 3.8%     | 1.3%         | 6.3%         | 4.9%     | 0.7%         | 9.2%         | 2.9%     | 0.7%         | 5.1%         |
| <b>Estimated Glomerular Filtration Rate</b>    |          |              |              |          |              |              |          |              |              |
| Mean (<20 mL/min/1.73 m <sup>2</sup> )         | 70.8     | 67.1         | 74.5         | 67.9     | 62.7         | 73.2         | 73.0     | 68.4         | 77.5         |
| ≥60                                            | 64.6%    | 57.3%        | 71.8%        | 58.5%    | 47.6%        | 69.4%        | 69.2%    | 59.9%        | 78.5%        |
| 45-59                                          | 20.7%    | 14.0%        | 27.3%        | 20.9%    | 12.0%        | 29.8%        | 20.5%    | 13.2%        | 14.8%        |
| 30-44                                          | 12.4%    | 7.0%         | 17.8%        | 16.6%    | 7.9%         | 25.3%        | 9.2%     | 3.6%         | 27.9%        |
| <30                                            | 2.3%     | 0.9%         | 3.7%         | 4.0%     | 0.5%         | 7.5%         | 1.1%     | -0.2%        | 2.3%         |
| <b>Mean Urine Albumin to Creatinine Ratio</b>  | 73.7     | 53.9         | 93.6         | 50.0     | 30.3         | 69.7         | 91.3     | 55.2         | 127.4        |
| <b>Mean Systolic Blood Pressure (mmHg)</b>     | 132.3    | 129.3        | 135.3        | 132.5    | 128.9        | 136.1        | 132.1    | 128.3        | 136.0        |
| <b>Mean Diastolic Blood Pressure (mmHg)</b>    | 69.1     | 67.1         | 71.1         | 65.6     | 62.5         | 68.7         | 71.7     | 69.3         | 74.0         |
| <b>Mean Body Mass Index (kg/m<sup>2</sup>)</b> | 33.3     | 32.2         | 34.4         | 34.5     | 32.0         | 37.0         | 32.4     | 31.5         | 33.2         |
| <b>History of Diabetes</b>                     | 45.7%    | 38.2%        | 53.1%        | 38.1%    | 27.9%        | 48.4%        | 51.4%    | 40.2%        | 62.7%        |
| <b>History of Myocardial Infarction</b>        | 45.5%    | 38.2%        | 52.7%        | 35.0%    | 24.4%        | 45.6%        | 53.5%    | 41.8%        | 65.1%        |
| <b>History of Stroke</b>                       | 20.0%    | 14.8%        | 25.2%        | 21.5%    | 12.2%        | 30.8%        | 18.9%    | 10.5%        | 27.2%        |
| <b>Chronic Obstructive Pulmonary Disease</b>   | 29.2%    | 22.0%        | 36.4%        | 26.9%    | 15.9%        | 37.9%        | 31.0%    | 22.9%        | 39.0%        |

**eTable 3:** Adverse event rates and numbers needed to harm with SGLT-2 inhibitors in the EMPEROR-Reduced and EMPEROR-Preserved trials.

| Endpoint                                                | Rate (95% CI) (per 100 patient years) |                   | Measure* (95% CI) | Rate difference (95% CI) |                       | Number needed to Harm (NNH) (95% CI) |                |
|---------------------------------------------------------|---------------------------------------|-------------------|-------------------|--------------------------|-----------------------|--------------------------------------|----------------|
|                                                         | Placebo                               | SGLT-2 inhibitor  |                   | 1-year outcome           | 3-year outcome        | 1-year outcome                       | 3-year outcome |
| <b>EMPEROR-Reduced and EMPEROR-Preserved, all LVEFs</b> |                                       |                   |                   |                          |                       |                                      |                |
| <b>Symptomatic hypotension</b>                          | 3.39 (2.99, 3.82)                     | 3.98 (3.54, 4.44) | 1.16 (0.99, 1.37) | 1.47<br>(0.52, 2.42)     | 0.54<br>(-0.07, 1.15) | 72 (45, 181)                         | 70 (38, 440)   |
| <b>Genital infections</b>                               | 0.43 (0.30, 0.59)                     | 1.25 (1.02, 1.51) | 2.90 (1.96, 4.28) | 1.29<br>(0.84, 1.73)     | 0.83<br>(0.54, 1.12)  | 79 (60, 117)                         | 42 (33, 56)    |
| <b>EMPEROR-Preserved trial, LVEF &gt;40%</b>            |                                       |                   |                   |                          |                       |                                      |                |
| <b>Symptomatic hypotension</b>                          | 2.86 (2.43, 3.32)                     | 3.63 (3.14, 4.16) | 1.28 (1.04, 1.58) | 1.97<br>(0.84, 3.09)     | 0.71<br>(0.03, 1.40)  | 54 (35, 117)                         | 52 (30, 212)   |
| <b>Genital infections</b>                               | 0.39 (0.25, 0.57)                     | 1.20 (0.93, 1.51) | 3.06 (1.89, 4.96) | 1.40<br>(0.86, 1.94)     | 0.82<br>(0.48, 1.16)  | 73 (53, 115)                         | 42 (32, 62)    |
